# Supplementary material
Source: PubMed Central journal article supplement (PMC5557711)
Supplement: NIHMS840612-supplement-01.pdf [file NIHMS840612-supplement-01.pdf]

## SUPPLEMENTAL TABLE

**Table S1**

| Group                                                        | Sequence (5' to 3')                                       | Reference organism | AT (°C) |
|--------------------------------------------------------------|-----------------------------------------------------------|--------------------|---------|
| Universal bacteria <sup>24</sup><br>(Uni340F/Uni514R)        | F': ACTCCTACGGGAGGCAGCAGT<br>R': ATTACCGCGGCTGCTGGC       | <i>E. coli</i>     | 63      |
| Bacteroidetes <sup>25</sup><br>(Bact934F/Bact1060R)          | F': GGARCATGTGGTTTAATTCGATGAT<br>R': AGCTGACGACAACCATGCAG | <i>B. fragilis</i> | 63      |
| <i>Enterobacteriaceae</i> <sup>24</sup><br>(Uni515F/Ent826R) | F': GTGCCAGCMGCCGCGGTAA<br>R': GCCTCAAGGGCACAACCTCCAAG    | <i>E. coli</i>     | 67      |

## SUPPLEMENTAL FIGURES

**Figure S1. Hh infection induces Ly6C<sup>+</sup> monocytes.** Representative FACS plots and bar graph of Ly6C and MHCII expression on CD64<sup>+</sup> monocytes in LP cells isolated from sham and Hh infected mice (n=8-12). Graphs show a representative experiment out of three independently performed with similar results.

**Figure S2. IL-22 depletion inhibits inflammation in the colon but not the cecum of Hh-infected Rag2<sup>-/-</sup> mice.** (A) Relative expression of TNF mRNA and (B) HAI in uninfected mice and Hh infected mice treated with control or anti-IL-22 antibody, as indicated.

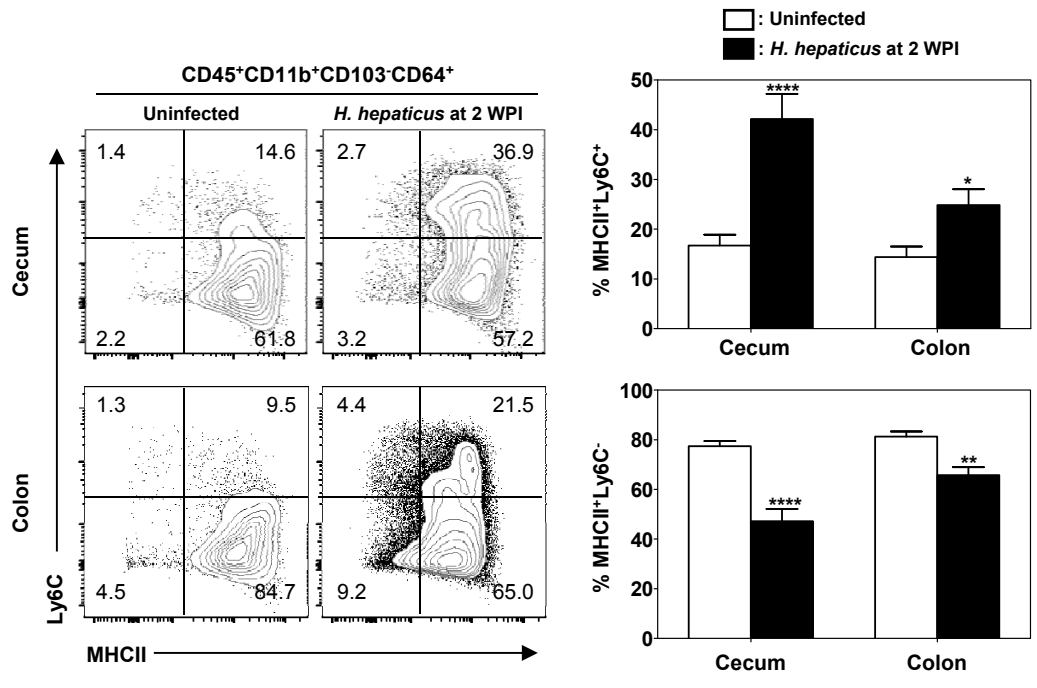

Supplemental Figure 1

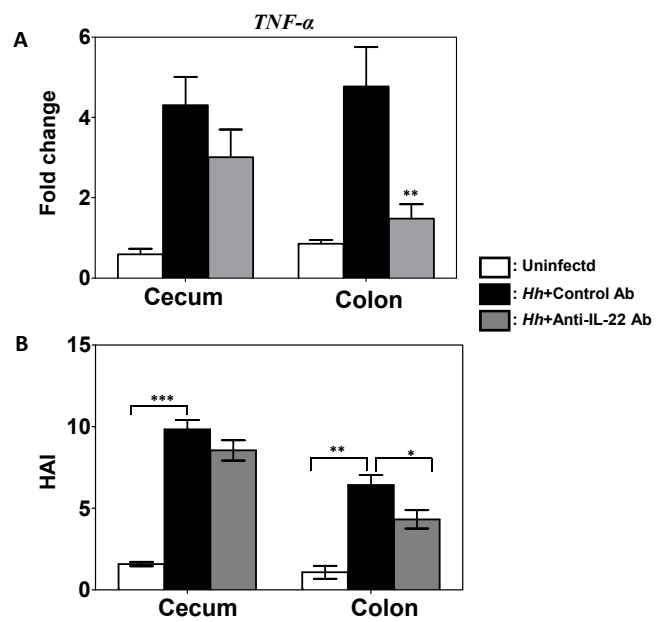

Supplemental Figure 2
